# Supplementary material
Source: PubMed Central journal article supplement (PMC4767500)

Rana et. al. Figure S1

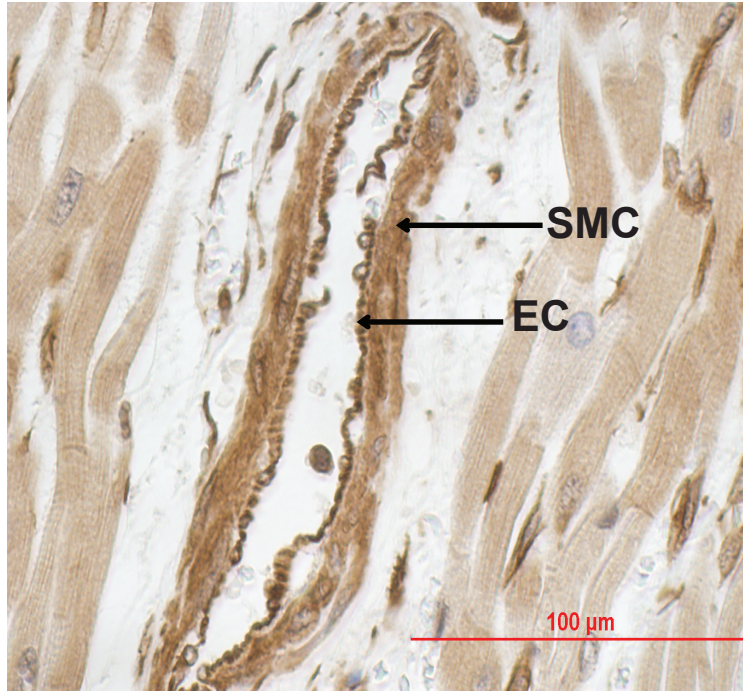

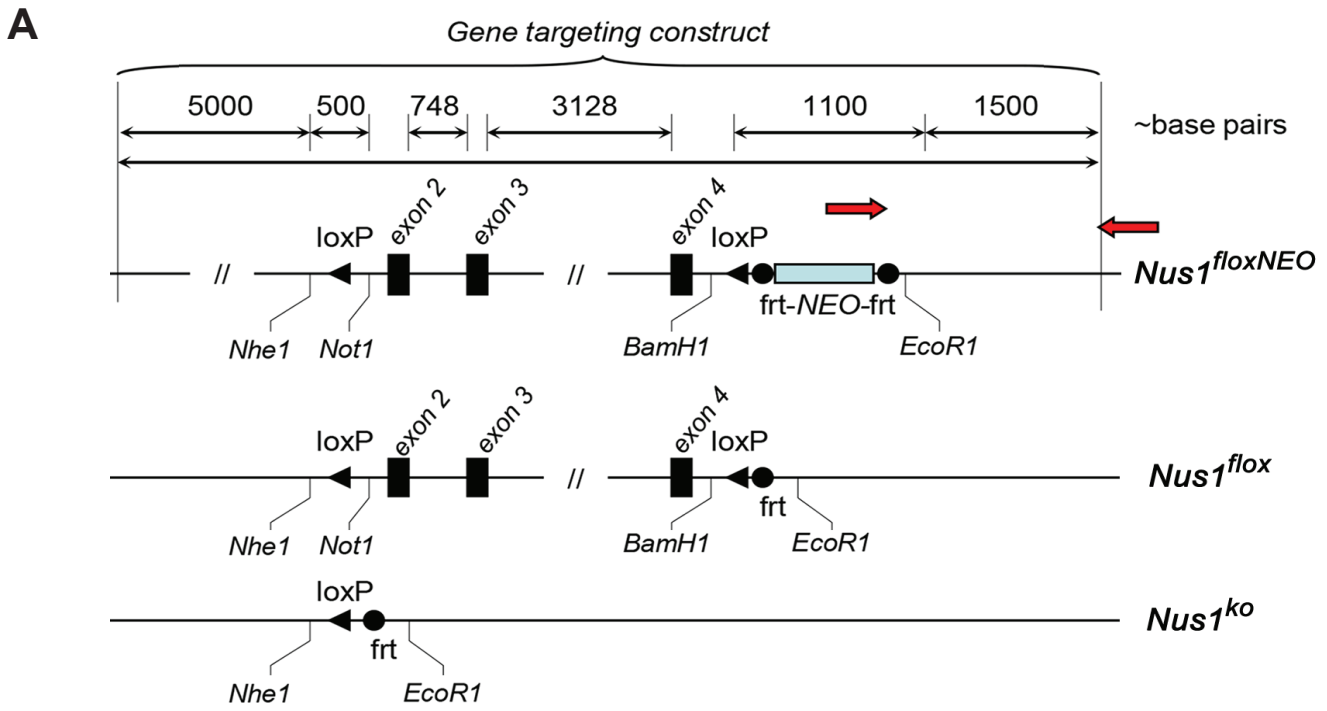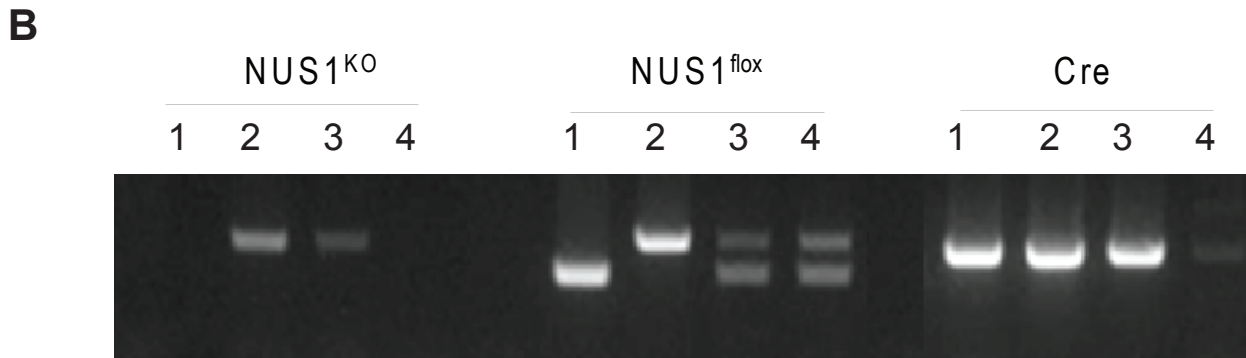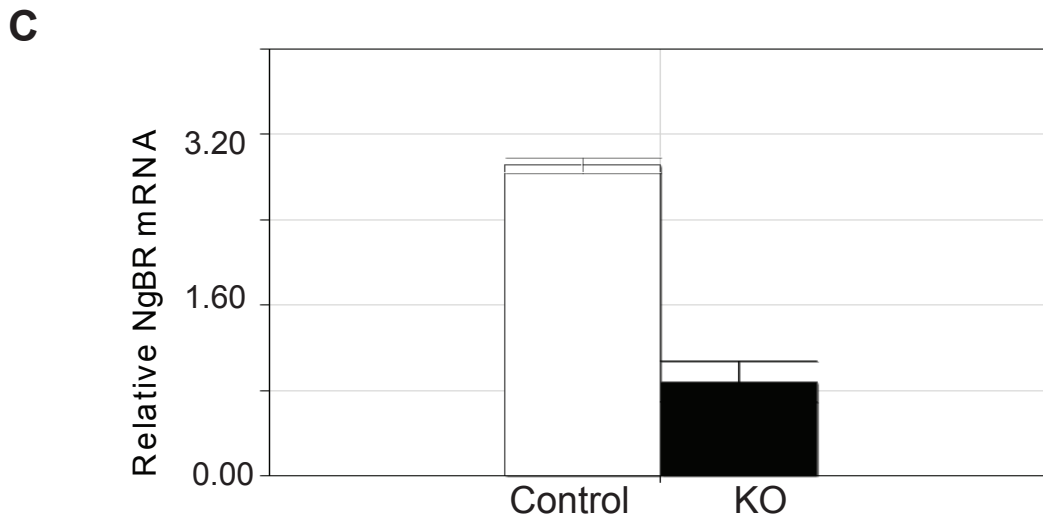

Rana et. al. Figure S3

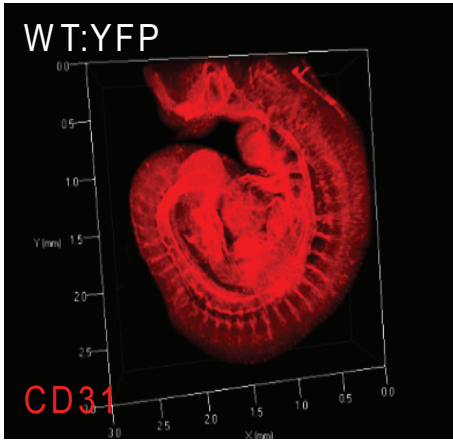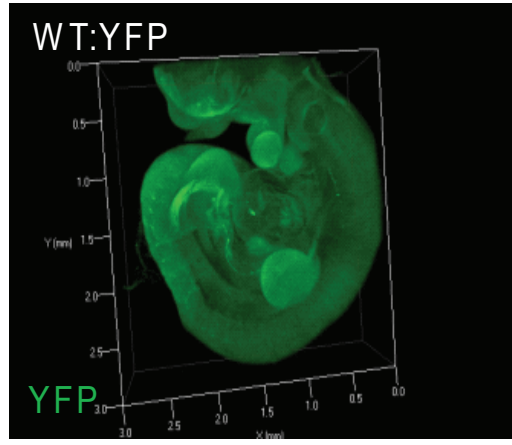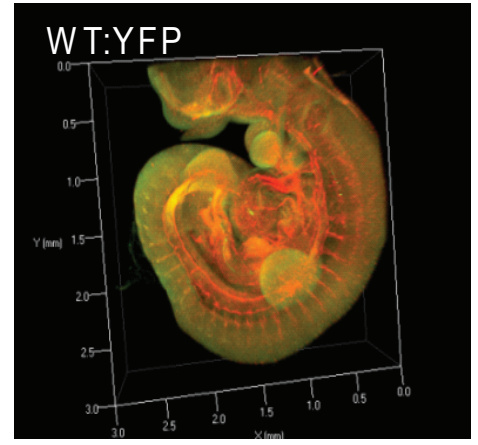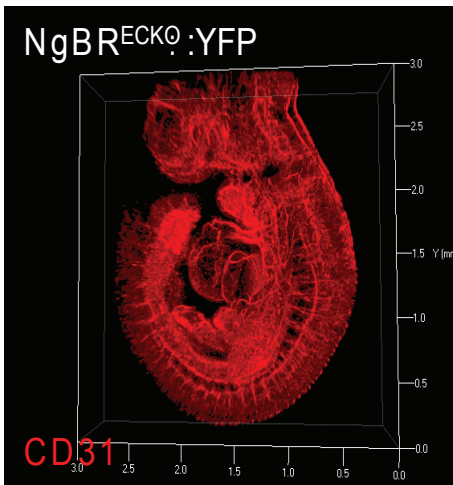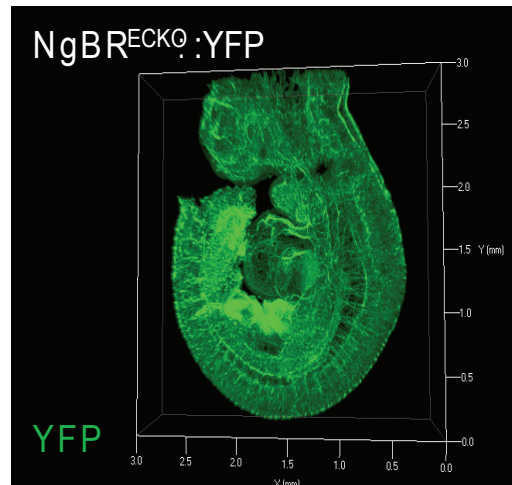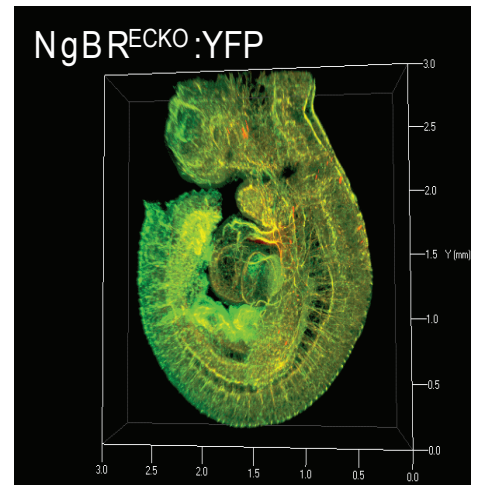

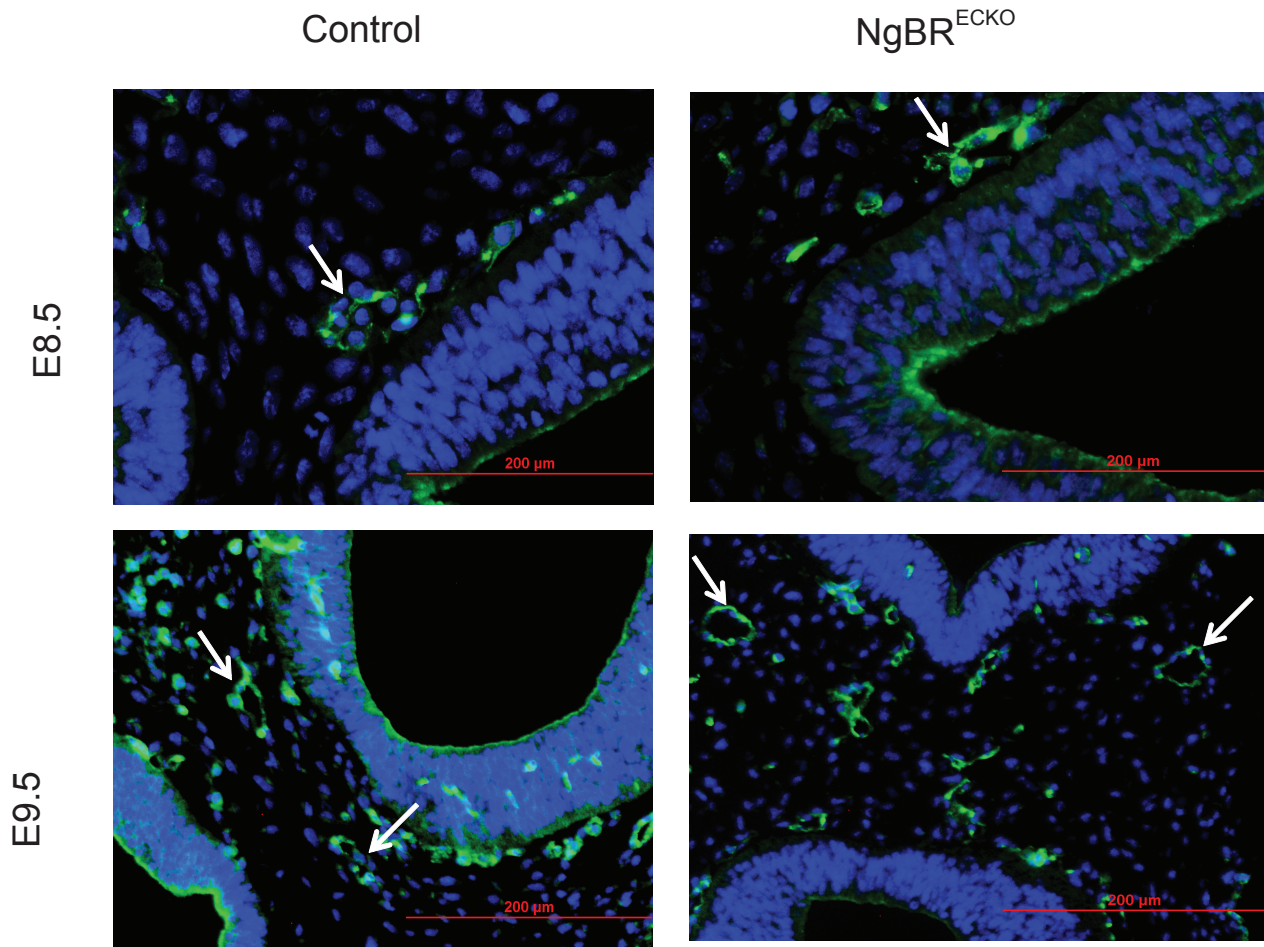

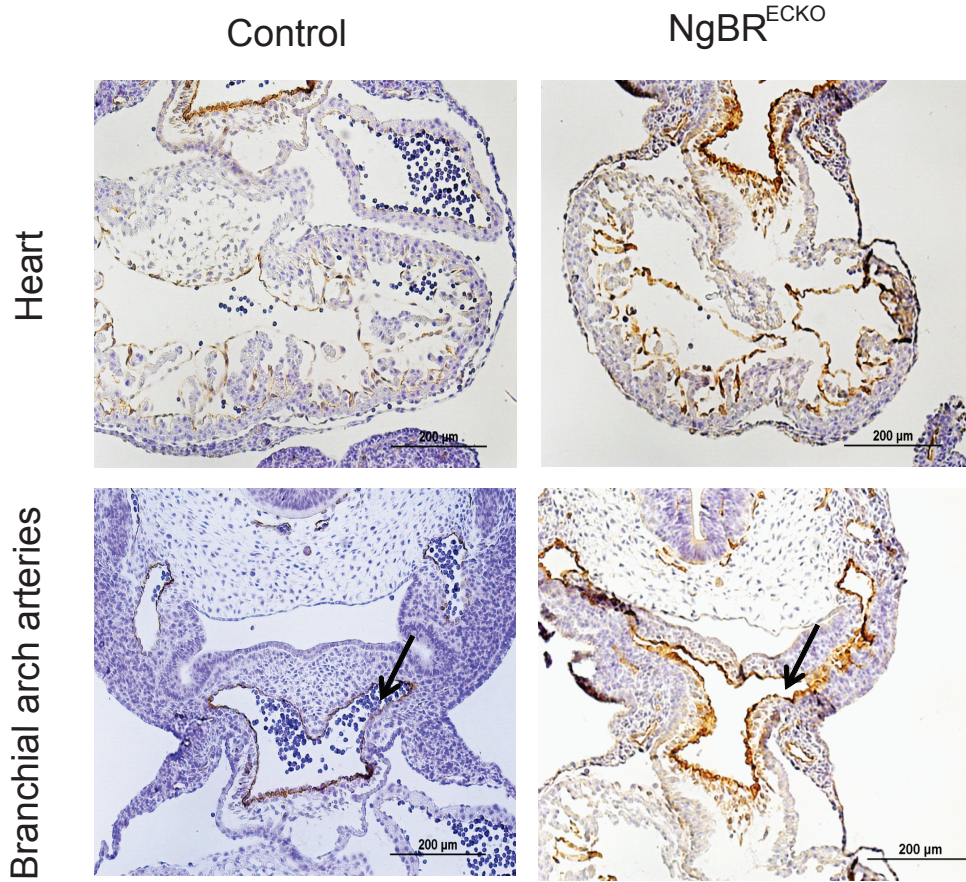

**A**

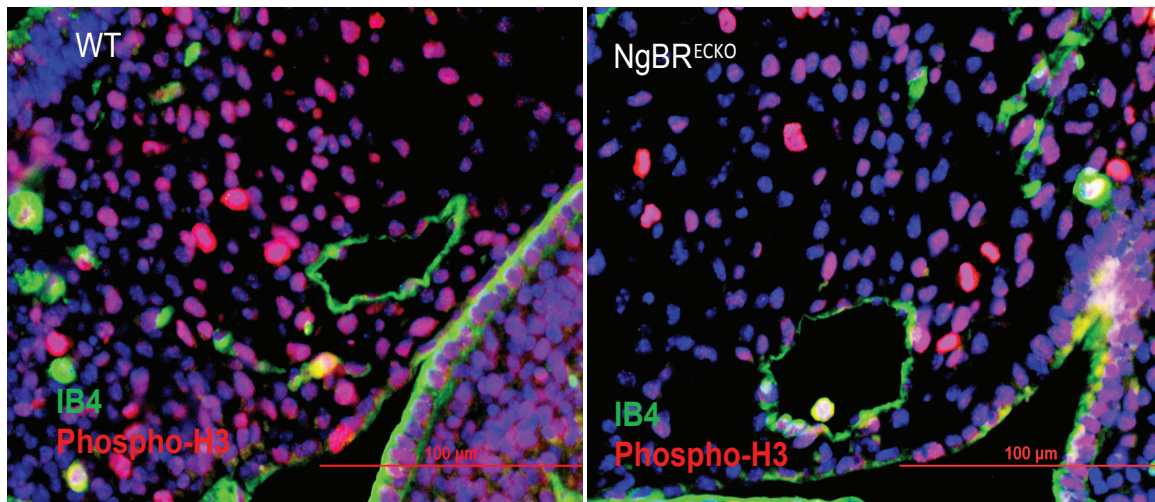

**B**

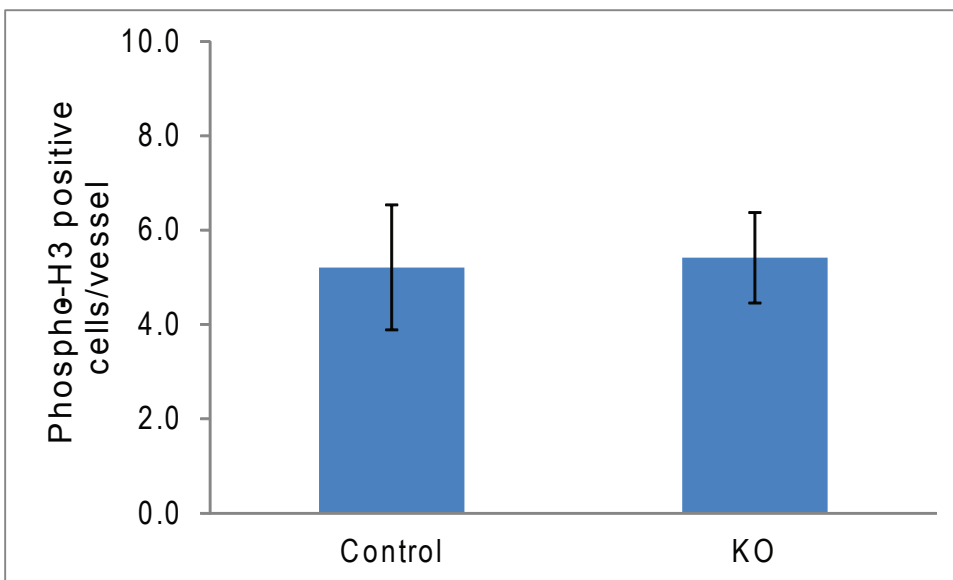

A

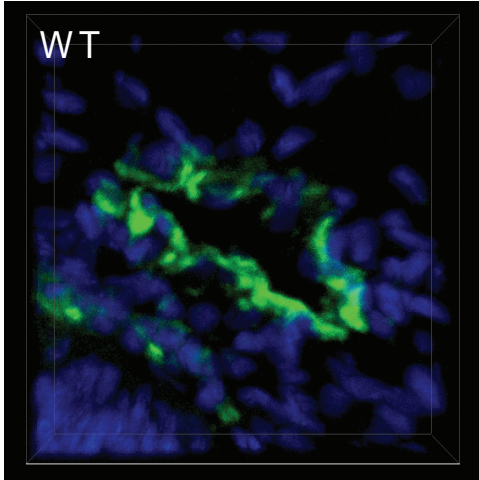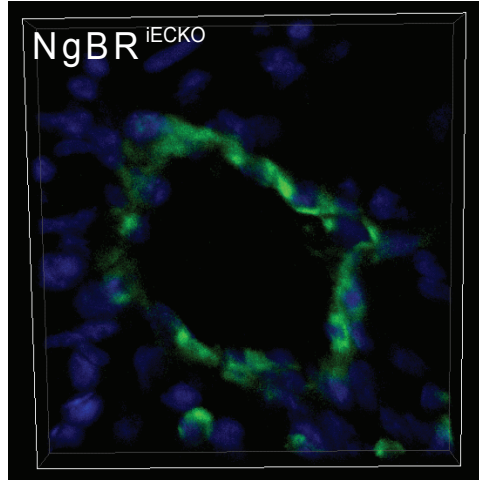

B

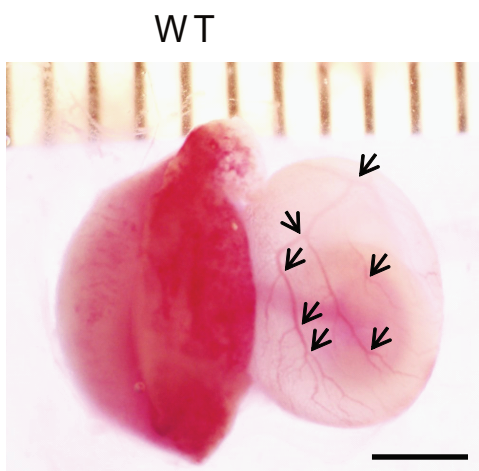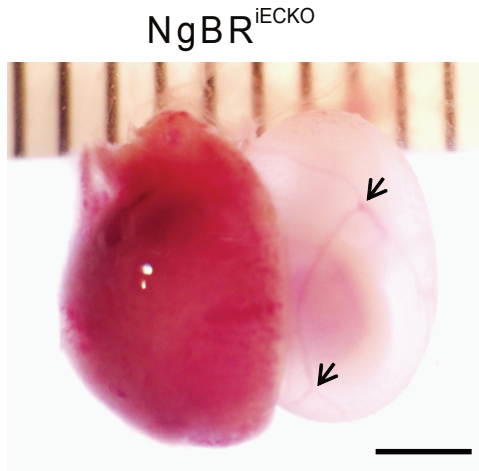

C

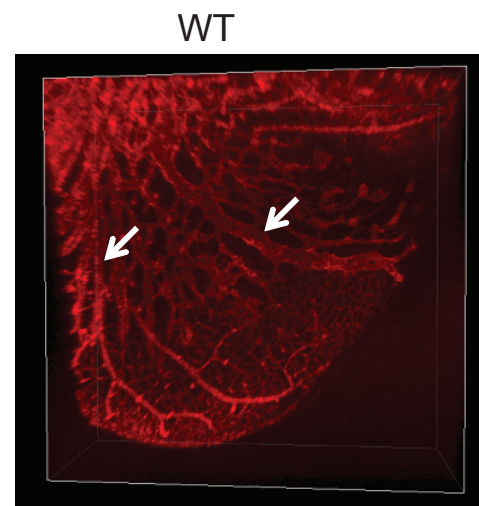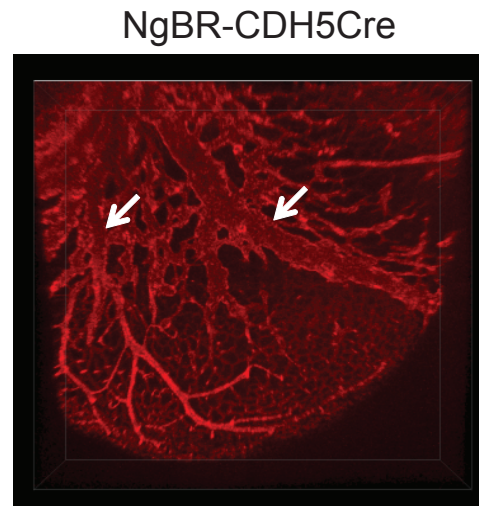

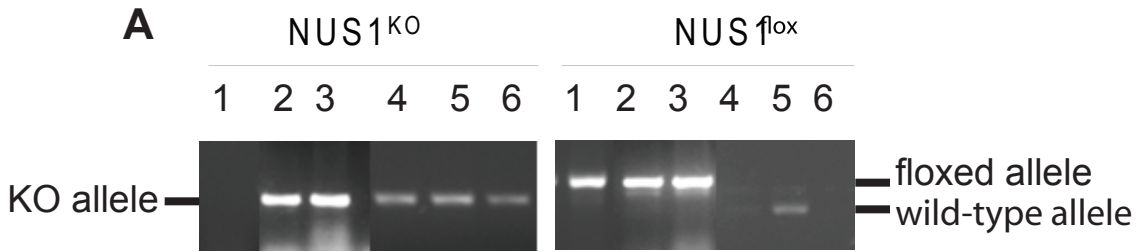

- 1 - ES -LoxP/LoxP (Homozygous control)
- 2,3 - ES - LoxP/- (Heterozygous)
- 4 - ES - -/- day 0 (KO)
- 5 - ES - -/- day 2 (KO with unmoved MEF)
- 6 - ES - -/- day 3 (KO) (floating cells)



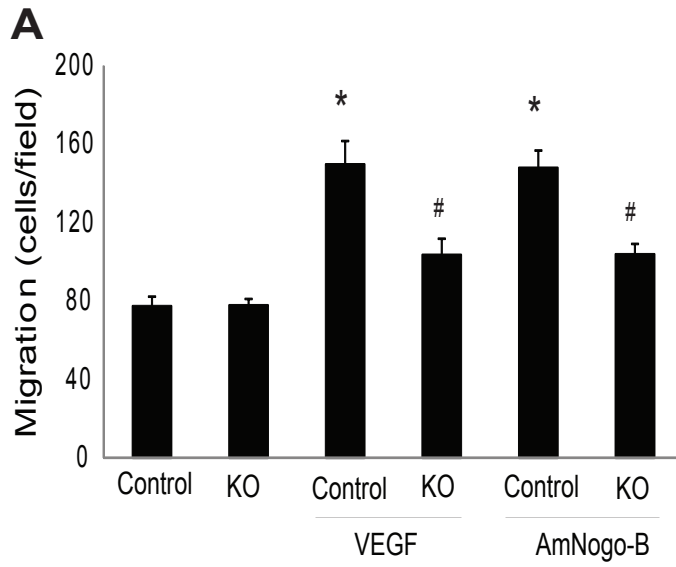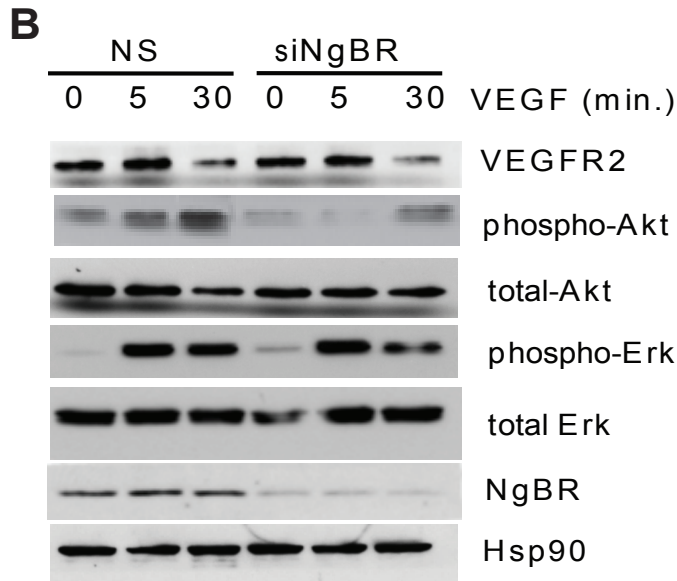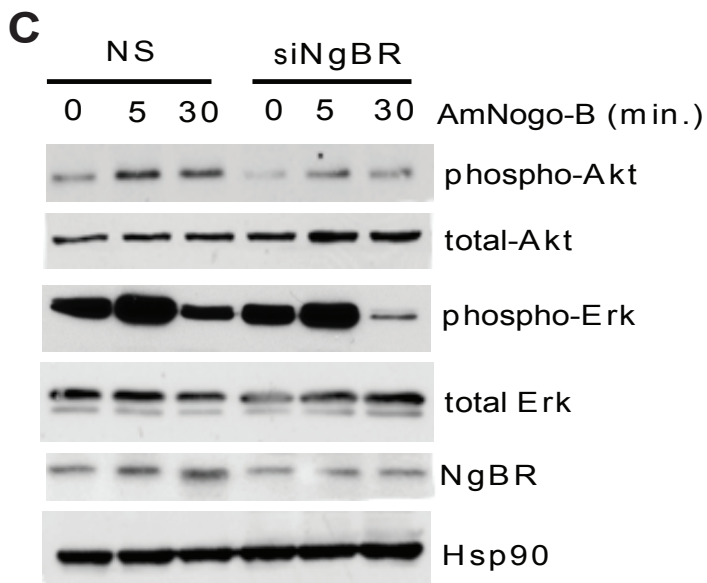

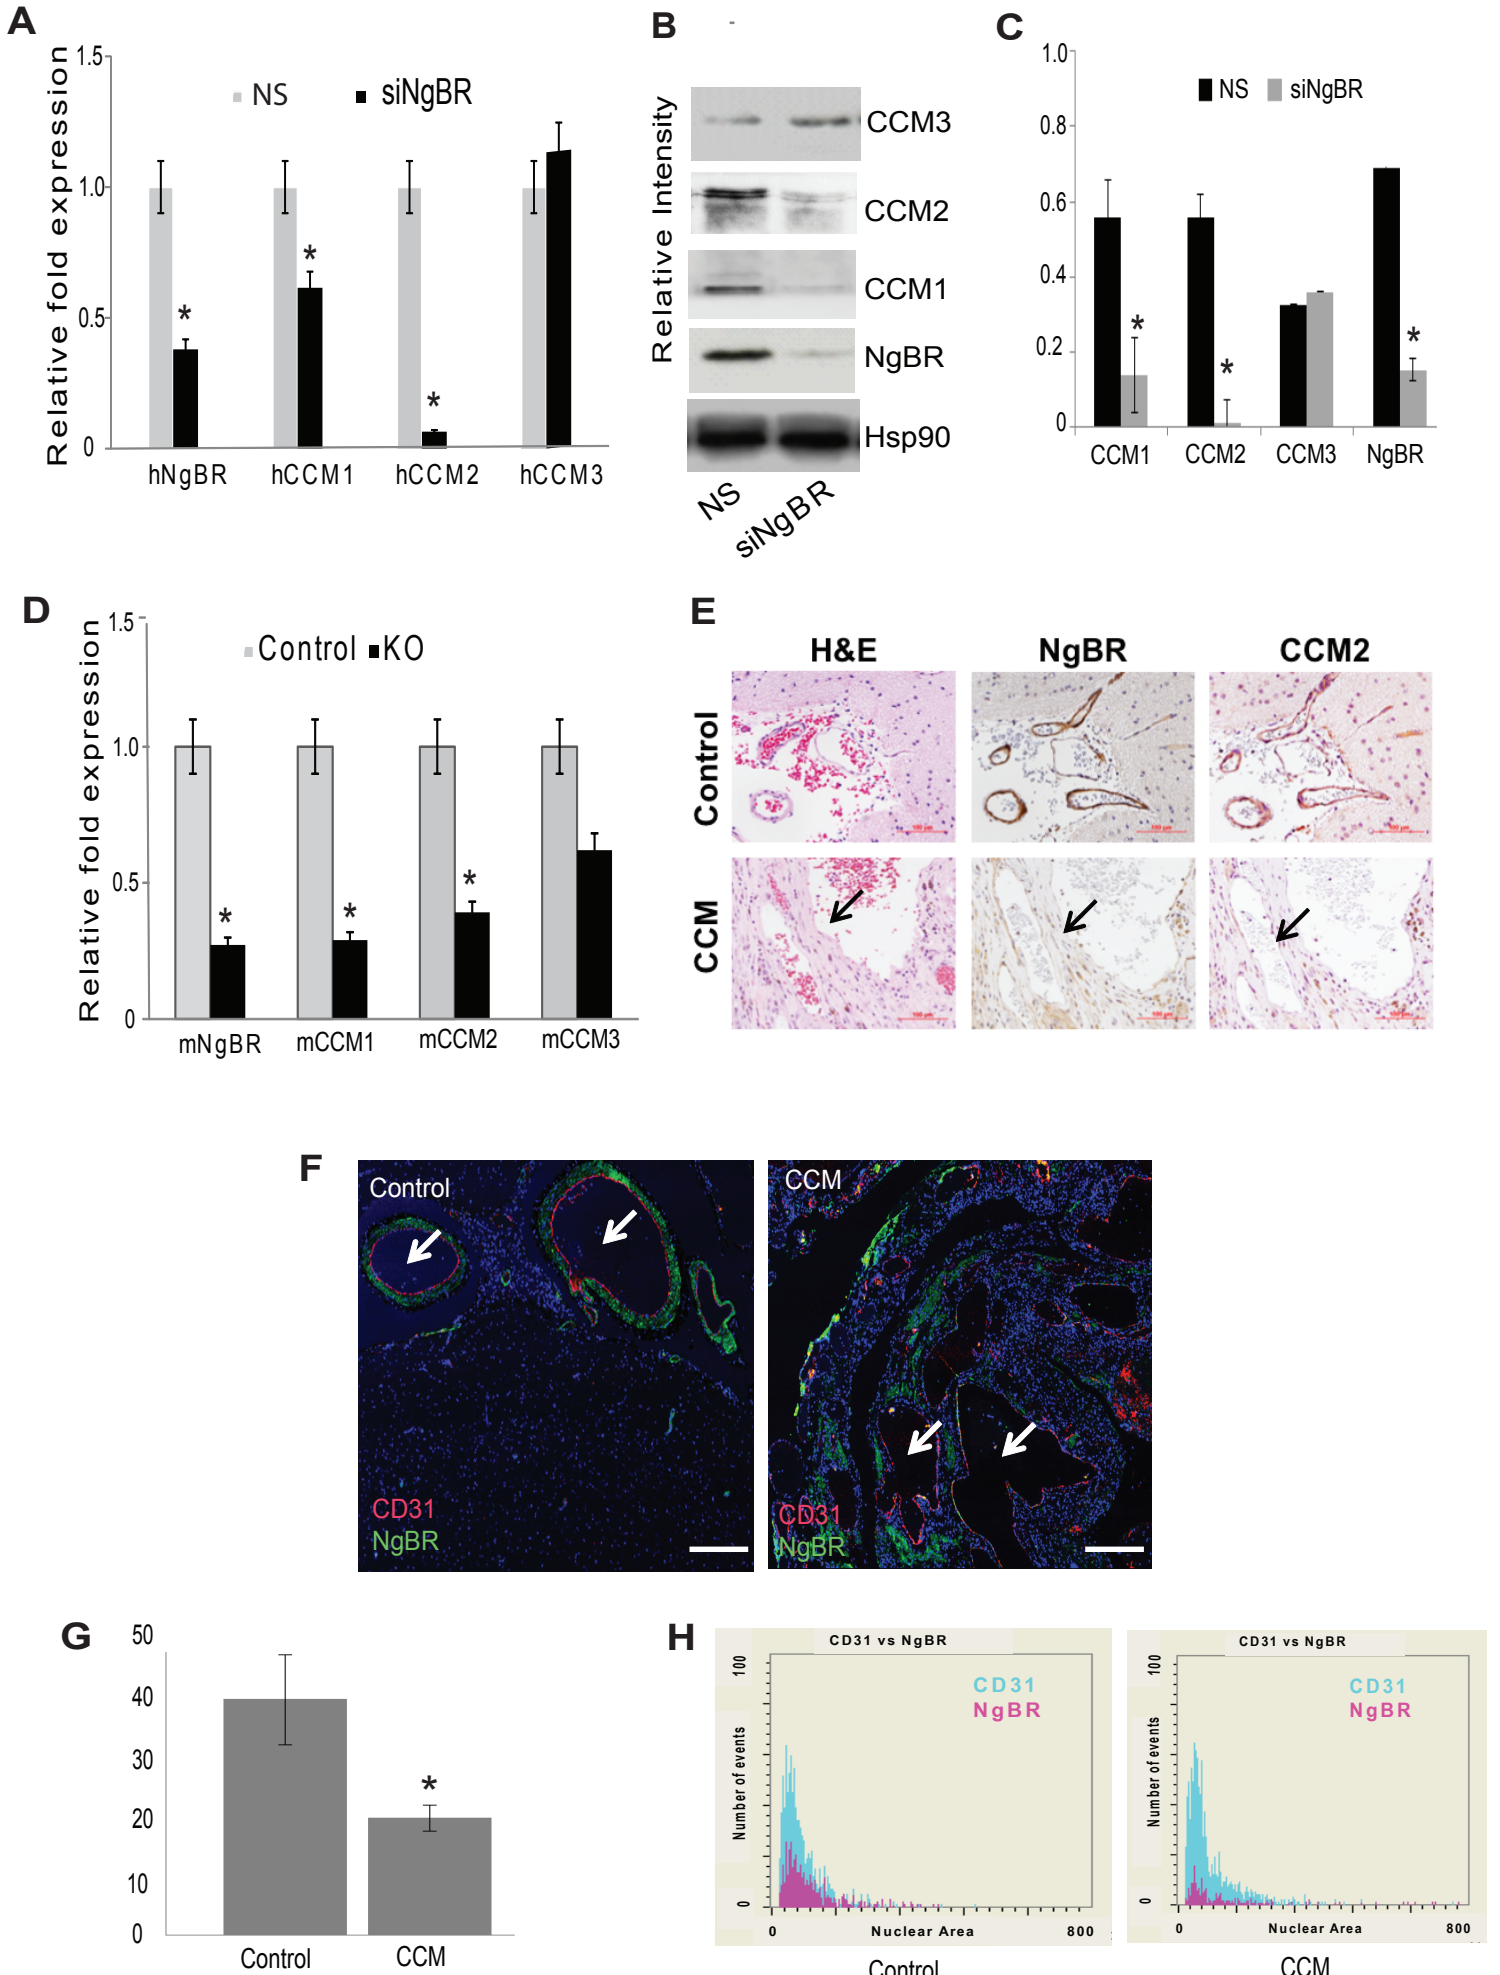

Supplement: NIHMS754315-supplement-7.pdf [file NIHMS754315-supplement-7.pdf]
